# Supplementary material for: DDX41 Recognizes RNA/DNA Retroviral Reverse Transcripts and Is Critical for In Vivo Control of Murine Leukemia Virus Infection
Source: PubMed Central journal article supplement (PMC5989071; doi:10.1128/mbio.00923-18), 2018-06-05
Supplement: mbo003183913sf1.pdf [file mbo003183913sf1.pdf]

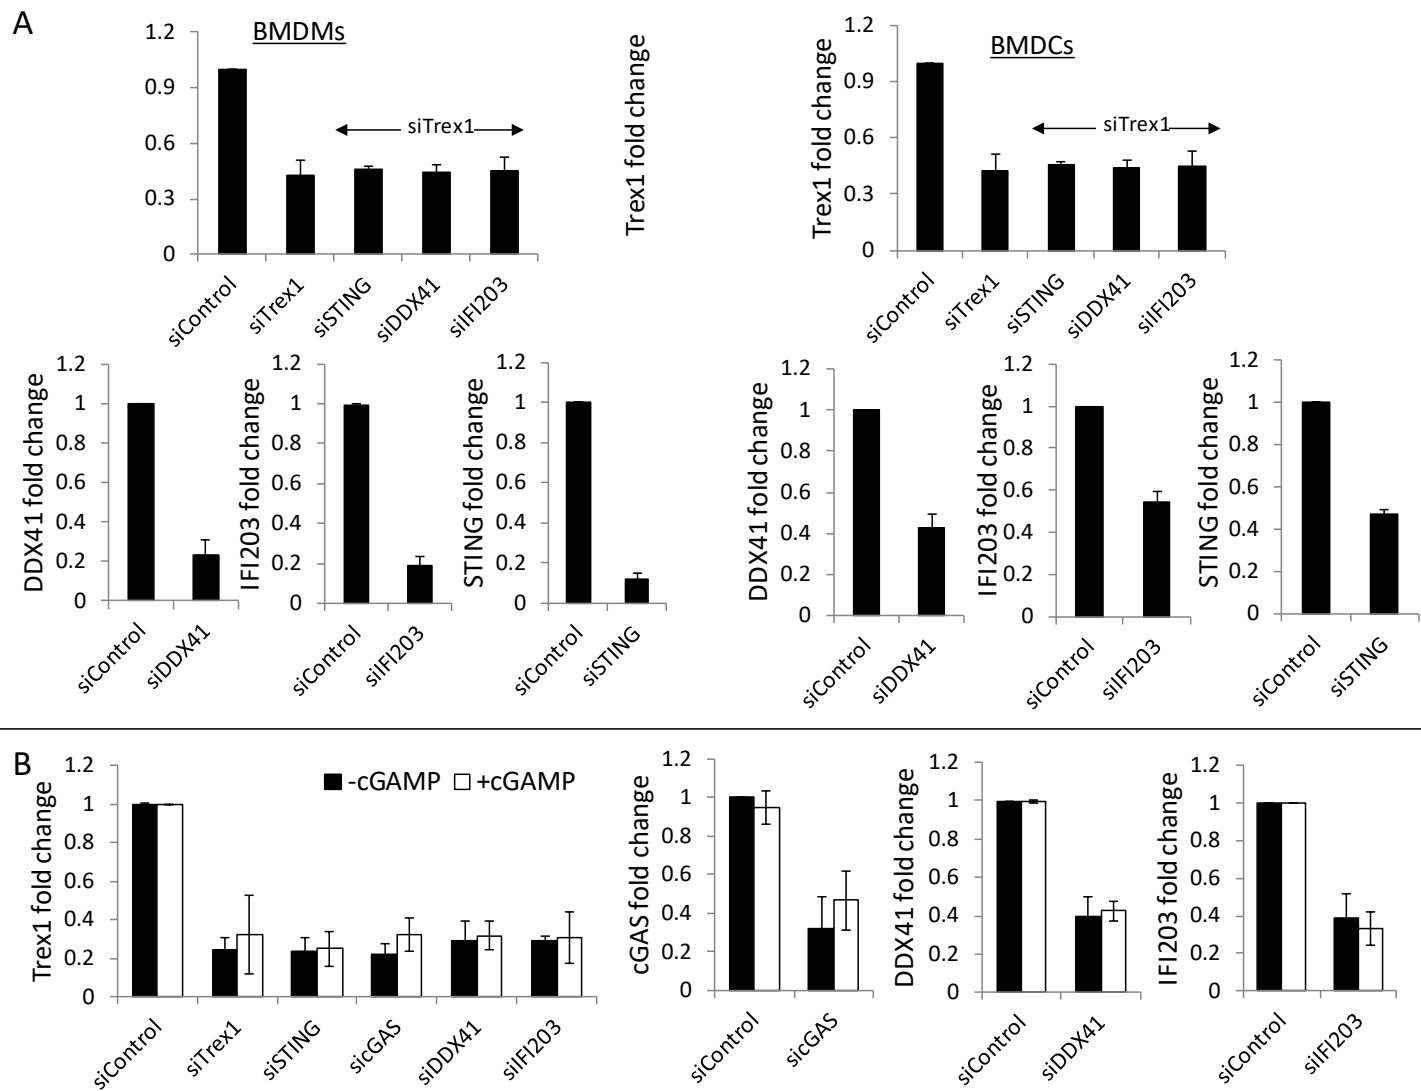

**FIG S1** Knockdown verification. Related to Fig. 1. (A) Knockdown of genes in Fig. 1A. The knockdowns of the three target genes (*Ddx41*, *Ifi203*, and *Sting*) were all done in the presence of *Trex1* knockdown, as indicated in the Fig. 1 legend. (B) Knockdown of genes in Fig. 1C. The Fig. 1 legend indicates the details.
