# Supplementary material for: DDX41 Recognizes RNA/DNA Retroviral Reverse Transcripts and Is Critical for In Vivo Control of Murine Leukemia Virus Infection
Source: PubMed Central journal article supplement (PMC5989071; doi:10.1128/mbio.00923-18), 2018-06-05
Supplement: mbo003183913sf3.pdf [file mbo003183913sf3.pdf]

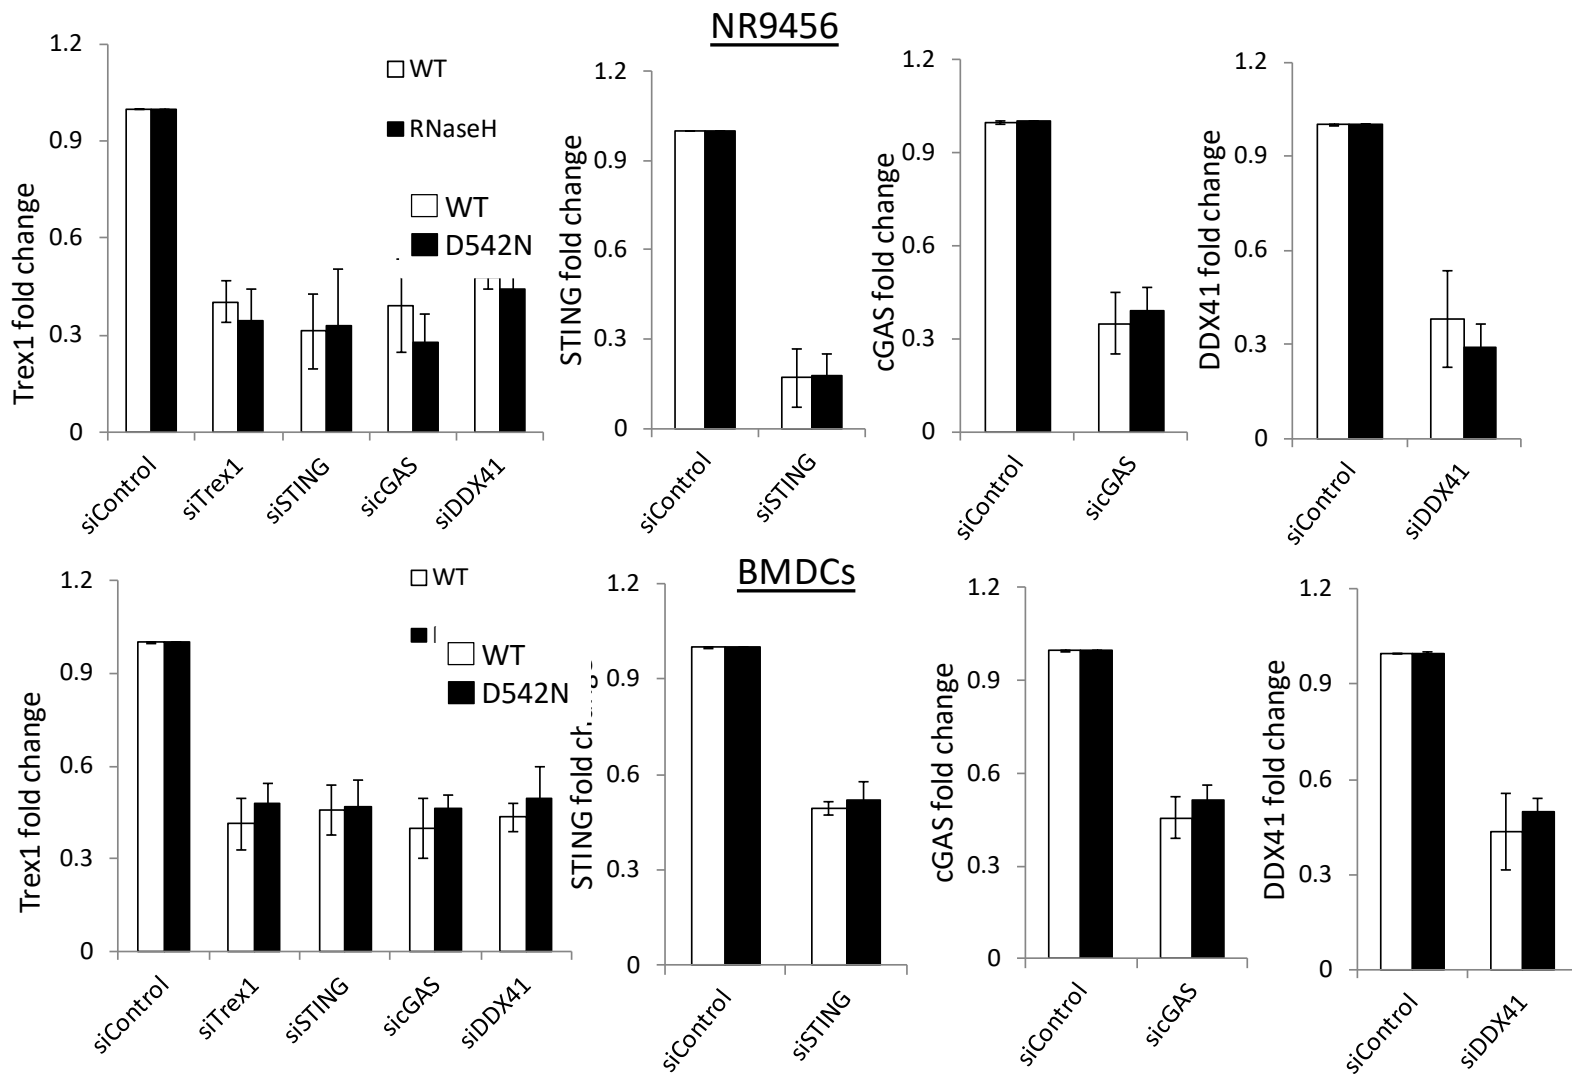

**FIG S3.** Knockdown verification. Related to Fig. 4. Knockdown of genes in Fig. 4C. The Fig. 4 legend indicates the details.
