# Supplementary material for: DDX41 Recognizes RNA/DNA Retroviral Reverse Transcripts and Is Critical for In Vivo Control of Murine Leukemia Virus Infection
Source: PubMed Central journal article supplement (PMC5989071; doi:10.1128/mbio.00923-18), 2018-06-05
Supplement: mbo003183913sf4.pdf [file mbo003183913sf4.pdf]

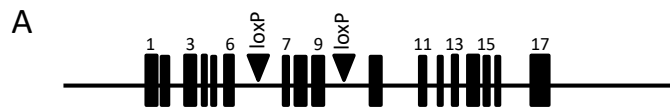

| Mouse Strain                    | BMDMs        |              |              | BMDCs        |              |              |
|---------------------------------|--------------|--------------|--------------|--------------|--------------|--------------|
|                                 | STING        | DDX41        | cGAS         | STING        | DDX41        | cGAS         |
| C57BL/6                         | 1.243 ± .435 | 0.731 ± .363 | 0.654 ± .114 | 0.666 ± .476 | 0.530 ± .209 | 0.170 ± .02  |
| STING <sup>gt/gt</sup>          | 0.006 ± .004 | 0.495 ± .316 | 0.368 ± .132 | 0.014 ± .021 | 0.335 ± .164 | 0.214 ± .128 |
| cGAS KO                         | 1.294 ± .192 | 0.670 ± .260 | 0.001 ± .001 | 0.65 ± .505  | 1.10 ± .139* | 0.003 ± .003 |
| CD11cCre DDX41 <sup>fl/fl</sup> | 1.378 ± .778 | 0.537 ± .267 | 0.834 ± .661 | 1.00 ± .370  | 0            | 0.278 ± .075 |
| LyCre DDX41 <sup>fl/fl</sup>    | 1.237 ± .486 | 0.003 ± .005 | 1.407 ± .744 | 0.89 ± .332  | 0.469 ± .172 | 0.29 ± .11   |

| Mouse                          | IFNβ/actin (x10 <sup>-3</sup> ) |           |
|--------------------------------|---------------------------------|-----------|
|                                | BMDM                            | BMDC      |
| C57BL/6                        | 0.017 ± 0.002                   | 1.1 ± 0.7 |
| STING <sup>gt/gt</sup>         | 0.015 ± 0.021                   | ND        |
| cGAS KO                        | 0.016 ± 0.003                   | 0.8 ± 0.1 |
| LyCre DDX41 <sup>fl/fl</sup>   | 0.022 ± 0.003                   | ND        |
| CD11cre DDX41 <sup>fl/fl</sup> | ND                              | 0.9 ± 0.6 |

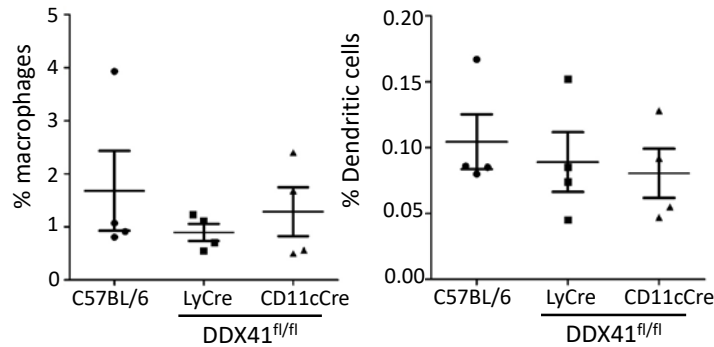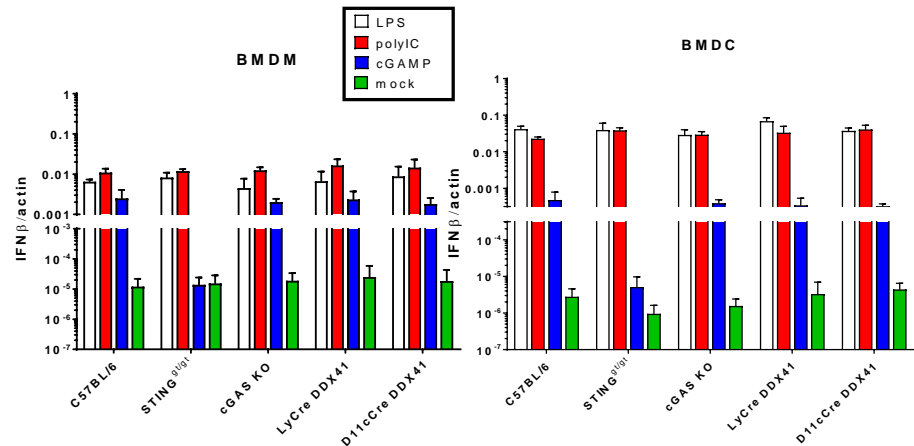

**FIG S4** Characterization of *Ddx41* KO mice. Related to Fig. 5 and 6. (A) Map of the *Ddx41* locus and inserted loxP sites. Expression of Cre recombinase results in the deletion of exons 7 to 9. (B) Quantification of DDX41, cGAS, and STING protein in various knockout mouse cells. Shown are the means ± SDs for 3 independent Western blotting assays of cells from 3 different mice of each strain. \*,  $P \leq 0.05$  compared to BL/6, *Sting*<sup>gt/gt</sup>, and CD11cCreDDX41 (unpaired t test). (C) Basal IFN-β RNA levels in *Ddx41* KO BMDMs and BMDCs. RNA was isolated from BMDMs of 3 mice and BMDCs of 2 mice each of the indicated genotypes, and qPCR was performed for IFN-β levels, using a standard curve to measure relative levels. Shown are the means ± SDs. Abbreviations: ND, not done. (D) PBMCs from 4 mice of each genotype were stained with conjugated anti-CD11c (DC) or anti-F4/80 (macrophage) antibodies and analyzed by FACS. (E) Treatment of *Ddx41* KO BMDMs and BMDCs with different ligands. BMDMs and BMDCs from the *cGAS*, *LyCre DDX41* and *CD11cCre-DDX41* KO and *Sting*<sup>gt/gt</sup> mice were treated with the indicated ligands, as described in Materials and Methods. RNA was isolated after 6 h of treatment for all ligands and subjected to RT-qPCR. Shown are the averages from 2 experiments (triplicate technical replicates) with cells isolated from different mice.
