# Supplementary material for: DDX41 Recognizes RNA/DNA Retroviral Reverse Transcripts and Is Critical for In Vivo Control of Murine Leukemia Virus Infection
Source: PubMed Central journal article supplement (PMC5989071; doi:10.1128/mbio.00923-18), 2018-06-05
Supplement: mbo003183913sf7.pdf [file mbo003183913sf7.pdf]

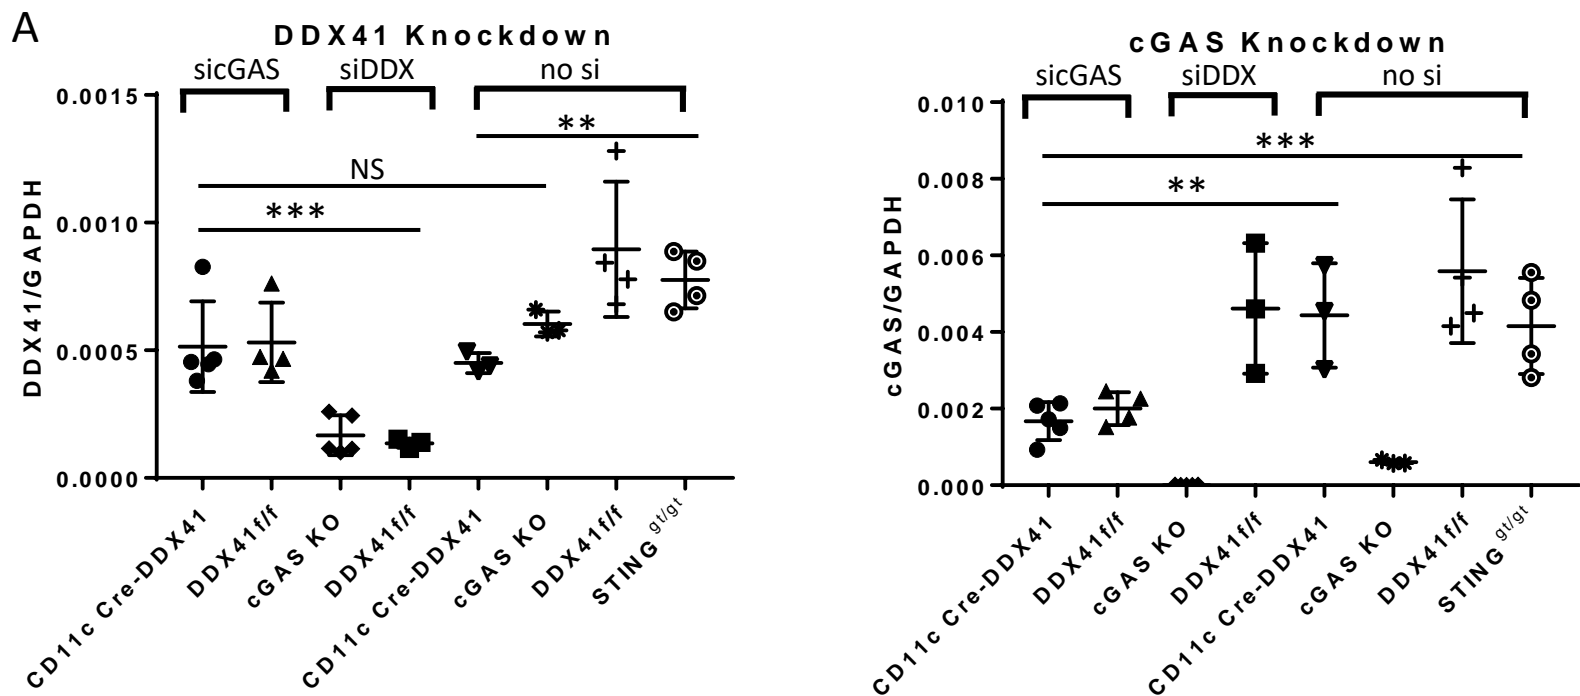

| Parental genotypes | Cre+,DDX41+      | Cre-,DDX41+      | Cre+,DDX41-      | Cre-,DDX41-      |
|--------------------|------------------|------------------|------------------|------------------|
| Cre+,DDX41+        | Cre+/+, DDX41+/+ | Cre+/-, DDX41+/+ | Cre+/+, DDX41+/- | Cre+/-, DDX41+/- |
| Cre-,DDX41+        | Cre+/-, DDX41+/+ | Cre-/-, DDX41+/+ | Cre+/-, DDX41+/- | Cre-/-, DDX41+/- |
| Cre+,DDX41-        | Cre+/+, DDX41+/- | Cre+/-, DDX41+/- | Cre+/+, DDX41-/- | Cre+/-, DDX41-/- |
| Cre-,DDX41-        | Cre+/-, DDX41+/- | Cre-/-, DDX41+/- | Cre+/-, DDX41-/- | Cre-/-, DDX41-/- |

**FIG S7** *In vivo* control of retrovirus infection requires both cGAS and DDX41. Related to Fig. 7. A) Knockdown verification of the *in vivo* siRNA experiment presented in Fig. 7A. B) Genotypes of the mice tested for MLV infection in Fig. 7B. Parental mice were Cre<sup>+/-</sup>, DDX41<sup>+/-</sup>. Cre refers to either LyCre or CD11cCre, as indicated in the text. Yellow highlighted boxes refer to homozygous, and white boxes to heterozygous, *Ddx41* tissue-specific knockouts; gray boxes refer to WT mice.
